# Supplementary material
Source: publisher figshare collection journal article supplement (https://tandf.figshare.com/ndownloader/files/15222209)
Supplement: Supplementary file 1 [file 15222209]

Figure Captions

Figure 1. Illustration of experimental set-up and equipment connections.

Figure 2. Reflective marker set-up (a) anterior view, (b) posterior view, (c) top view of anatomic representation.

Figure 3. Top view of the four permanently marked laser point locations on the vibration platform, used for the laser Doppler vibrometer (LDV) measurements. The foot was repositioned for each test to ensure the anatomic location being measured was situated over one of these four points. Laser points (LP) from 1 to 4, LP1-LP4, correspond to the four positions on the platform where the LDV beam was directed at the platform. Numbers between the brackets indicate the x, y, and z coordinates (assuming the origin of the axes is the lower-left corner of the platform marked 0,0,0 on the image).

Figure 4. Average (± standard deviation) of the entire FTV transmissibility response of 21 participants plotted for measures taken at 24 anatomical locations across a frequency range of 10-200Hz. Excluded measurements include: one participant at T2P1, T3P1, and H1 and two participants at M4.

Figure 5. (a) Average peak frequency, , and peak frequency of the average, , and, (b) average peak amplitude, , and peak amplitude of the average, , measured at 24 locations on the foot.

Figure 6: Comparison of transmissibility results at the first metatarsal head (a), medial malleolus (b), and lateral malleolus (c) from three previously completed studies (Goggins et al., 2016; Harazin & Grzesik, 1998; Wee & Voloshin, 2013).

Figure 7: Average phase angle plots for 21 participants at T1P3 (a) and L3 (b).

Appendix A: Laser point (LP) locations (1-4) for 21 participants at 24 anatomical locations.

Appendix B: The individual transmissibility responses of 21 participants at 24 anatomical locations. Excluded measurements include: one participant at T2P1, T3P1, and H1 and two participants at M4.

Appendix C: The average (black line) ± standard deviation (grey dotted line) of the entire transmissibility, phase and coherence responses of 21 participants for 24 anatomical locations. Coherence plot only shows negative standard deviation, as measure above unity are not possible. Excluded measurements include: one participant at T2P1, T3P1, and H1 and two participants at M4.
